# Supplementary material for: Association of Do-Not-Resuscitate Patient Case Mix With Publicly Reported Risk-Standardized Hospital Mortality and Readmission Rates
Source: PubMed Central journal article supplement (PMC7361656; doi:10.1001/jamanetworkopen.2020.10383), 2020-07-14
Supplement: jamanetwopen-3-e2010383-s001.pdf [file jamanetwopen-3-e2010383-s001.pdf]

## Supplementary Online Content

Pollock BD, Herrin J, Neville MR, et al. Association of do-not-resuscitate patient case mix with publicly reported risk-standardized hospital mortality and readmission rates. *JAMA Netw Open*. 2020;3(7):e2010383.  
doi:10.1001/jamanetworkopen.2020.10383

**eTable.** Sensitivity Analysis: Results from Expanding DNR Definition to Include DNR At Any Time During Inpatient Stay Versus the Main Analysis (POA DNRs Only)

**eFigure 1.** Patient-Level 30-Day Mortality Condition-Specific Age-Adjusted Associations Between Elixhauser Index and Probability of Having a Present-on-Admission DNR

**eFigure 2.** Hospital-Level 30-Day Mortality Condition-Specific Distributions of Observed Present-on-Admission DNR and Observed/Expected Present-on-Admission DNR

This supplementary material has been provided by the authors to give readers additional information about their work.

**eTable.** Sensitivity Analysis: Results from Expanding DNR Definition to Include DNR At Any Time During Inpatient Stay Versus the Main Analysis (POA DNRs Only)

| 30-day mortality cohorts                   | AMI         |                    | HF          |                    | Stroke |             | Pneumonia   |                    | COPD        |                    |
|--------------------------------------------|-------------|--------------------|-------------|--------------------|--------|-------------|-------------|--------------------|-------------|--------------------|
|                                            | Main        | Sensitivity        | Main        | Sensitivity        | Main   | Sensitivity | Main        | Sensitivity        | Main        | Sensitivity        |
| <i>DNR prevalence</i>                      | 12%         | 15%                | 16%         | 19%                | 16%    | 20%         | 20%         | 24%                | 12%         | 15%                |
| 1 <sup>st</sup> quintile, mean 30-day RSMR | 12.53       | 12.62              | 10.71       | 11.32              | 13.03  | 13.23       | 14.98       | 15.56              | 8.11        | 8.29               |
| 2 <sup>nd</sup> quintile, mean 30-day RSMR | 12.55       | 12.69              | 10.87       | 11.33              | 13.35  | 13.49       | 15.35       | 15.58              | 8.16        | 8.37               |
| 3 <sup>rd</sup> quintile, mean 30-day RSMR | 12.57       | 12.82              | 11.22       | 11.57              | 13.82  | 13.91       | 15.42       | 15.76              | 8.24        | 8.49               |
| 4 <sup>th</sup> quintile, mean 30-day RSMR | 12.64       | 12.88              | 11.52       | 11.85              | 13.96  | 14.15       | 15.66       | 16.02              | 8.51        | 8.76               |
| 5 <sup>th</sup> quintile, mean 30-day RSMR | 12.94       | 13.17              | 11.73       | 12.10              | 14.25  | 14.43       | 15.80       | 16.00              | 8.52        | 8.78               |
| 30-day readmission cohorts                 | AMI         |                    | HF          |                    | Stroke |             | Pneumonia   |                    | COPD        |                    |
| <i>Analysis</i>                            | <i>Main</i> | <i>Sensitivity</i> | <i>Main</i> | <i>Sensitivity</i> | -      | -           | <i>Main</i> | <i>Sensitivity</i> | <i>Main</i> | <i>Sensitivity</i> |
| <i>DNR prevalence</i>                      | 10%         | 12%                | 15%         | 18%                | -      | -           | 19%         | 22%                | 12%         | 14%                |
| 1 <sup>st</sup> quintile, mean 30-day RSRR | 15.89       | 15.97              | 22.06       | 22.03              | -      | -           | 16.60       | 16.69              | 19.58       | 19.60              |
| 2 <sup>nd</sup> quintile, mean 30-day RSRR | 15.67       | 15.81              | 21.99       | 22.09              | -      | -           | 17.00       | 16.97              | 19.71       | 19.67              |
| 3 <sup>rd</sup> quintile, mean 30-day RSRR | 15.57       | 15.69              | 21.58       | 21.67              | -      | -           | 16.75       | 16.74              | 19.59       | 19.58              |
| 4 <sup>th</sup> quintile, mean 30-day RSRR | 15.43       | 15.57              | 21.20       | 21.37              | -      | -           | 16.47       | 16.50              | 19.43       | 19.47              |
| 5 <sup>th</sup> quintile, mean 30-day RSRR | 15.34       | 15.48              | 20.73       | 20.99              | -      | -           | 16.16       | 16.24              | 19.15       | 19.19              |

**eFigure 1.** Patient-Level 30-Day Mortality Condition-Specific Age-Adjusted Associations Between Elixhauser Index and Probability of Having a Present-on-Admission DNR

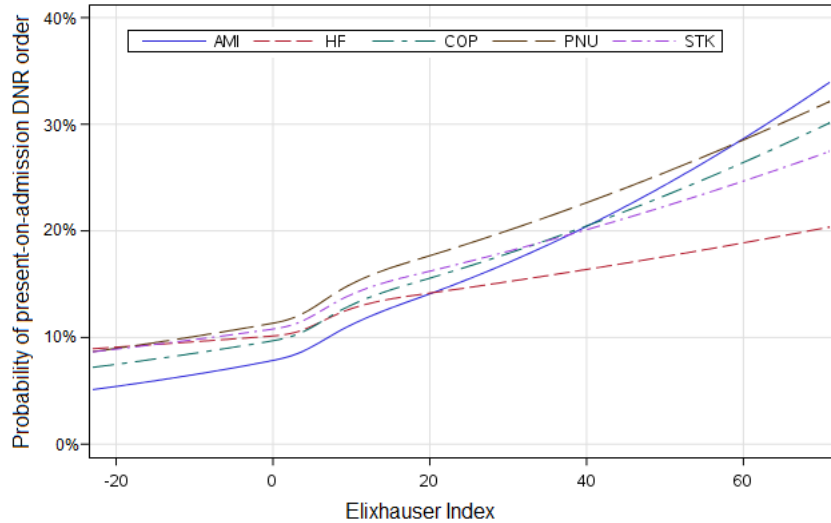

AMI=Acute Myocardial Infarction; HF=Heart Failure; COP=Chronic Obstructive Pulmonary Disease; PNU=Pneumonia; STK=Stroke; DNR=Do-Not-Resuscitate.

Elixhauser Index is a single integer value ranging from -32 (lowest possible comorbidity burden) to 99 (highest possible comorbidity burden); Modeled using a restricted cubic spline function from a pooled cohort of 4,884,237 condition-specific inpatient encounters among US Medicare beneficiaries from July 2015-June 2018.

**eFigure 2.** Hospital-Level 30-Day Mortality Condition-Specific Distributions of Observed Present-on-Admission DNR and Observed/Expected Present-on-Admission DNR

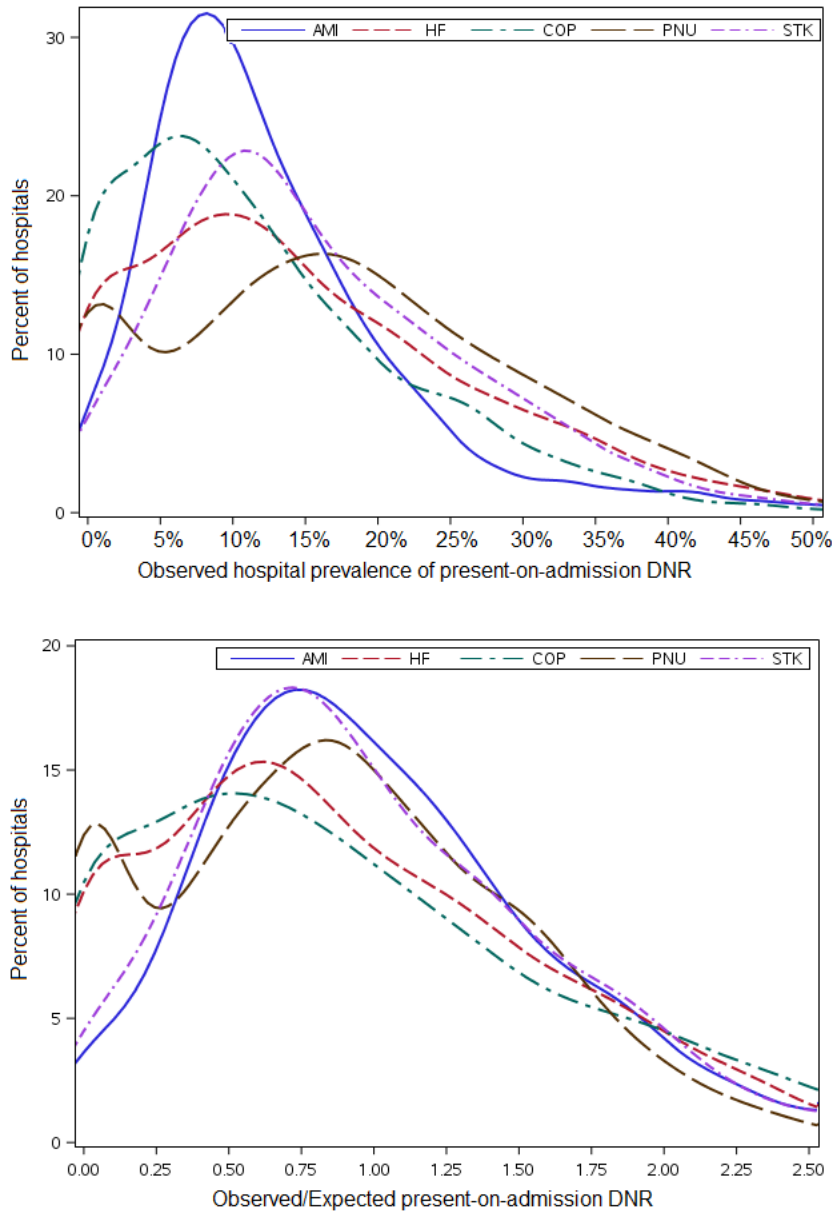

AMI=Acute Myocardial Infarction; HF=Heart Failure; COP=Chronic Obstructive Pulmonary Disease; PNU=Pneumonia; STK=Stroke; DNR=Do-Not-Resuscitate.

Density plots represent all US hospitals with a publicly reported 30-day risk-standardized mortality rate (on CMS Hospital Compare website, accessed August 2019) for AMI (n=2,268 hospitals); HF (n=3,488); stroke (n=2,501); pneumonia (n=4,009); COPD (n=3,536). The y-axis indicates percent of all hospitals.
